# Supplementary material for: The adsorption of water-soluble ionic liquids on graphene oxide of different oxygen content
Source: Royal Society of Chemistry journal article supplement (doi:10.1039/c4ra09422k), 2014-01-01
Supplement: c4ra09422k1.pdf [file c4ra09422k1.pdf]

## Supplementary Information

### The Adsorption of Water-soluble Ionic Liquids on Graphene Oxide of Different Oxygen Content

Tian Longlong<sup>1</sup> and Zhang Xin<sup>2</sup>, Qi Wei<sup>1</sup>, Liu Dan<sup>1</sup>, Jin Qiang<sup>1</sup>, Lin Jing<sup>1</sup>, Ye

Yuanlv<sup>4</sup>, Li Zhan<sup>3\*</sup>, Wu Wangsuo<sup>1\*</sup>

1. Radiochemical Laboratory, Lanzhou University, Lanzhou, Gansu, China, 730000
2. Institute of Modern Physics, Chinese Academy of Sciences, Lanzhou, Gansu, China, 730000
3. Lanzhou Institute of Chemistry Physics, Chinese Academic of Science, Lanzhou, Gansu, China, 730000
4. Nuclear and Radiation Safety Center, Ministry of Environmental Protection of China, Beijing, China, 100082

Corresponding author: Li Zhan, Email: [lizhancg@licp.cas.cn](mailto:lizhancg@licp.cas.cn); Wu Wangsuo, Email: [wuws@lzu.edu.cn](mailto:wuws@lzu.edu.cn).

#### S1: measurement of ionic liquids

The competitive sorption experiments of [bmim][Cl] and [n-bPy][Cl]: the 211 nm and 258 nm were adsorption peak of [bmim][Cl] and [n-bPy][Cl], respectively. So but a little adsorption peak of [n-bPy][Cl] was also 211 nm, so it was hard to directly measure the concentrations of [bmim][Cl] and [n-bPy][Cl] in mixture solution using UV. But a stable ratio (SR) of adsorption peaks could be found for [n-bPy][Cl] in 211 and 258 nm, so we could calculate the ABS of 211 as following:

$$ABS_{211}([n - bPy][Cl]) = \frac{ABS_{258}([n - bPy][Cl])}{SR}$$

So the  $ABS_{211}$  of [bmim][Cl] :

$$ABS_{211}([bmim][Cl]) = ABS_{211}([bmim][Cl]) - ABS_{211}[n - bPy][Cl]$$

And then according this formula, we could do standard curve the [bmim][Cl] and

[n-bPy][Cl], so the concentrations of [bmim][Cl] and [n-bPy][Cl] in mixture solution could be measured and calculated. Other sorption experiments were performed according to above methods.

### S2: C1s and O1s XPS spectra of LGO, CGO and HGO.

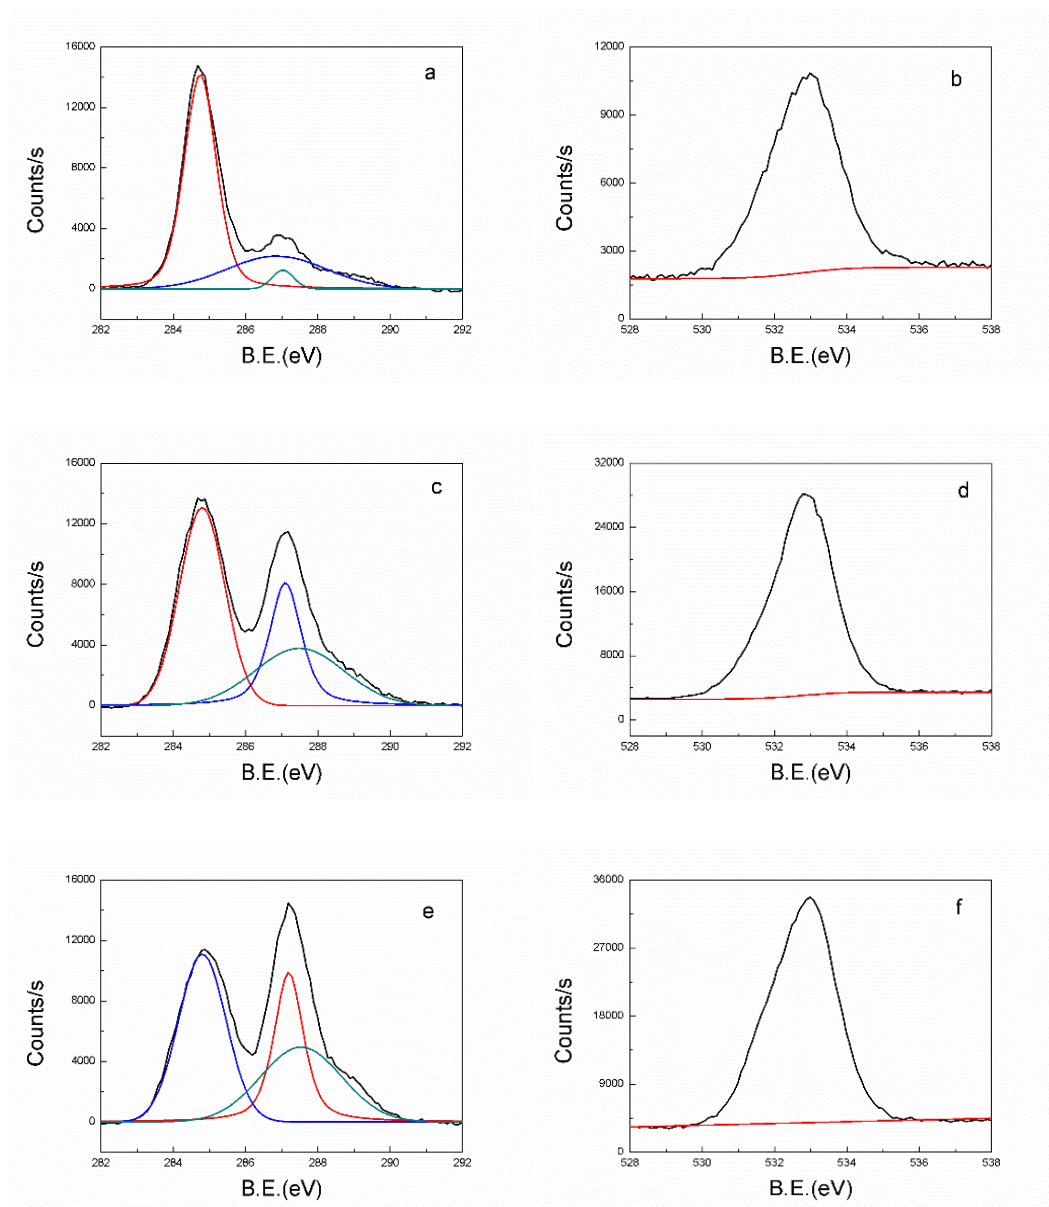

**Figure S1** C1s and O1s XPS spectra of LGO(a,b), CGO(c, d) and HGO(e,f);

C1s spectra were compared by deconvoluting each spectrum into three peaks that correspond to the following functional groups: carbon  $sp^2$  (C=C, 284.8 eV), epoxy/hydroxyls (C-O, 287.1eV), carbonyl (C=O, 287.6eV).

### S3: adsorption data fitting

The Freundlich equation (eq 1) was employed to fit the sorption data. Its general form

was

$$Q = k_F C_e^n \quad (1)$$

Where  $Q$  (mol/g) was the amount of adsorbate adsorbed per unit mass of the adsorbent;  $C_e$  (mol/L) was the adsorbate concentration at equilibrium;  $K_F$  (mol<sup>n-1</sup> L<sup>n</sup>/g) was the sorption affinity coefficient; and  $n$  was an indicator of isotherm nonlinearity related to the heterogeneity of sorption sites.

The Langmuir equation (eq 2) was employed to fit the sorption data. Its general form was

$$q_e = k Q_\infty C_e / (1 + k C_e) \quad (2)$$

Where  $q_e$  (mol/g) was the amount of adsorbate adsorbed per unit mass of the adsorbent;  $C_e$  (mol/L) was the adsorbate concentration at equilibrium;  $Q_\infty$  (mol/g) was the maximum adsorption amount; and  $k$  (L/mol) was Langmuir sorption equilibrium constant.

#### **S4: thermodynamic behavior of ILs on GO**

Adsorption isothermals under different temperature were conducted. The adsorption of [bmim][Cl] on HGO (*fig. 2Sa*), mainly forming chemical bonds, was positive to temperature. And R. Gašparac *et al.* reported that the adsorption of imidazole and its derivatives depended on temperature<sup>1</sup>. While the adsorption of [n-bPy][Cl] on LGO (*fig. 2Sb*), mainly forming nonchemical bonds, was negative to temperature, similar to Xu Jing's report<sup>2</sup>.

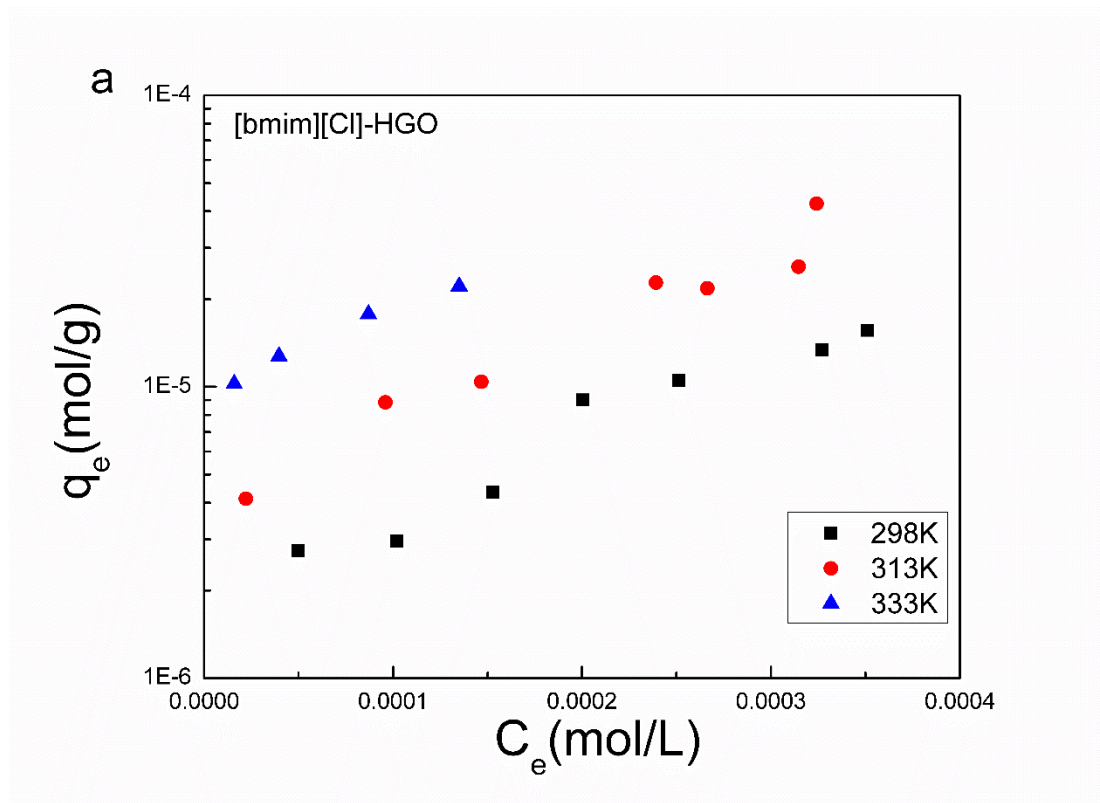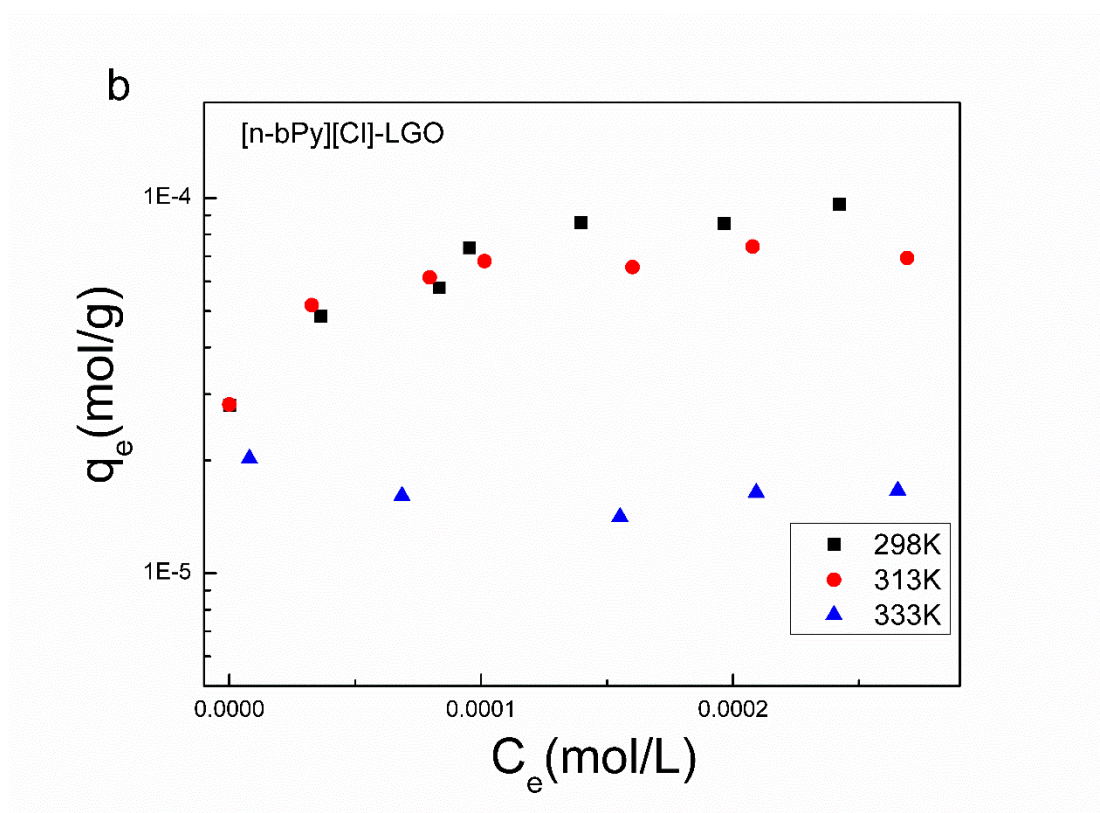

**Figure S2** Adsorption isotherm of [bmim][Cl] on HGO (a) and [n-bPy][Cl] on LGO (b) at pH=5.5 and ionic strength  $I=0.1$  mol/L.

1. R. Gašparac, C. R. Martin and E. Stupnišek - Lisac, *Journal of The Electrochemical Society*, **2000**, *147*, 548-551.
2. J. Xu, L. Wang and Y. Zhu, *Langmuir*, **2012**, *28*, 8418-8425.
